# Supplementary material
Source: PubMed Central journal article supplement (PMC4322429)
Supplement: NIHMS653598-supplement.pdf [file NIHMS653598-supplement.pdf]

SUPPLEMENTARY INFORMATION

**Figure S1.** Structural scheme of IgG and the location of its sites of glycosylation.

Approximately 20% of an individual's IgGs have N-glycans attached to the variable region.

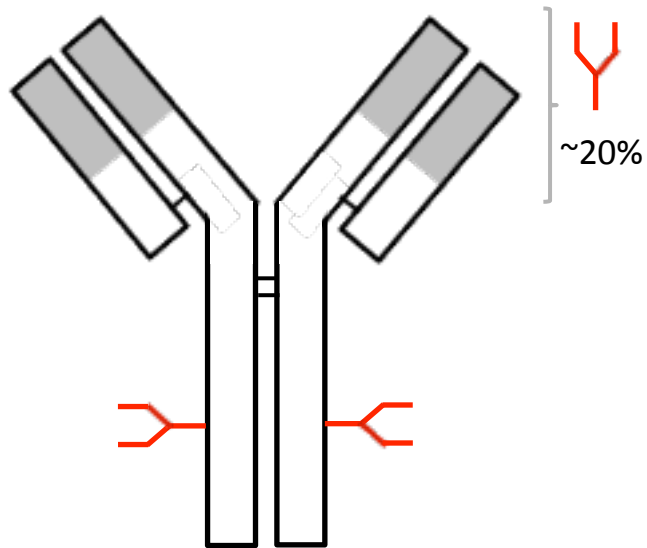

**Figure S2. SDS-PAGE of purified Immunoglobulin G.** Protein marker was loaded in lane 1, while immunocaptured IgG was loaded in lane 2. Clear separation was observed between the heavy chain (~49 kDa) and the light chain (~25 kDa) of IgG.

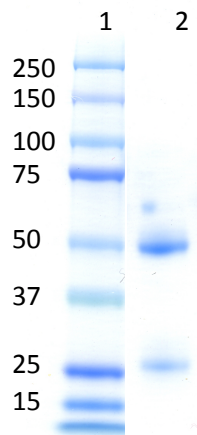

**Figure S3. Typical IgG N-glycan profile obtained using nLC-PGC-chip-TOF-MS.**

The thick black line represents the Extracted Glycan Chromatogram, while the inserted colored areas represent the individual glycans. Only higher abundant glycans are annotated according to the following key: blue square: N-acetyl glucosamine, green ball: mannose, yellow ball: galactose, red triangle: fucose and purple diamond: sialic acid.

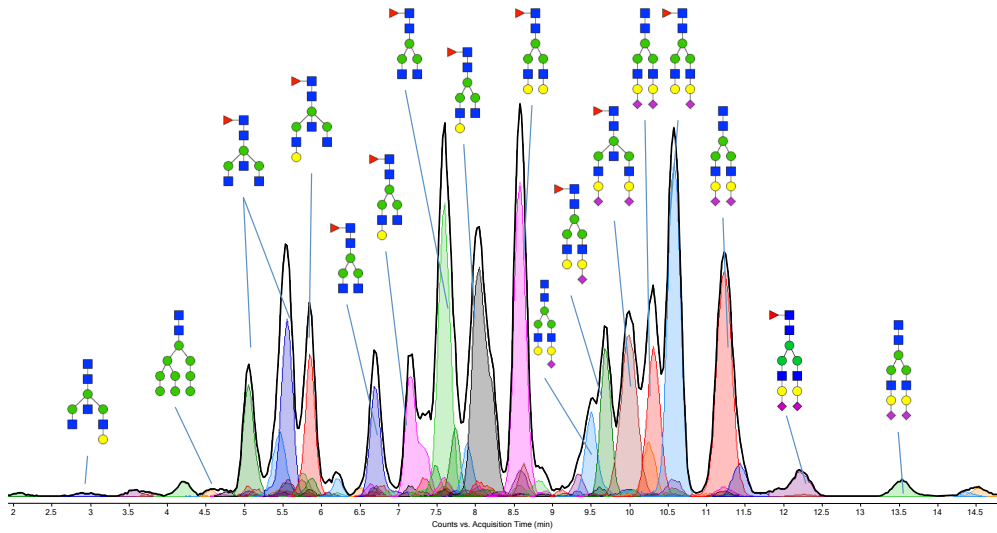

**Table S4.** Glycan compositions observed on IgG from patient serum. The table is ordered according to the average abundance of the individual glycan compositions in the 18 NAG cases. FDR-adjusted p-values were obtained using the three-way ANOVA for the different disease groups (NAG, DU and GC); a dash indicates a non-significant result (FDR-adjusted p-value > 0.1).

| No. | Composition                                                 | Mass (calc.) | Average abundance (%) | S.D. | FDR adjusted p-value |
|-----|-------------------------------------------------------------|--------------|-----------------------|------|----------------------|
| 1   | H <sub>3</sub> N <sub>4</sub> F <sub>1</sub>                | 1462.544     | 12.97                 | 4.31 | 0.0026               |
| 2   | H <sub>5</sub> N <sub>4</sub> F <sub>1</sub> S <sub>1</sub> | 2077.745     | 12.10                 | 3.16 | 0.0704               |
| 3   | H <sub>4</sub> N <sub>4</sub> F <sub>1</sub>                | 1624.597     | 11.52                 | 2.61 | 0.0520               |
| 4   | H <sub>5</sub> N <sub>4</sub> S <sub>2</sub>                | 2222.783     | 10.23                 | 5.02 | -                    |
| 5   | H <sub>5</sub> N <sub>4</sub> F <sub>1</sub>                | 1786.650     | 7.76                  | 3.24 | 0.0757               |
| 6   | H <sub>5</sub> N <sub>5</sub> F <sub>1</sub> S <sub>2</sub> | 2571.920     | 6.46                  | 1.21 | -                    |
| 7   | H <sub>3</sub> N <sub>5</sub> F <sub>1</sub>                | 1665.624     | 5.84                  | 2.24 | 0.0656               |
| 8   | H <sub>4</sub> N <sub>5</sub> F <sub>1</sub>                | 1827.677     | 5.08                  | 1.55 | -                    |
| 9   | H <sub>5</sub> N <sub>4</sub> S <sub>1</sub>                | 1931.688     | 4.09                  | 0.95 | -                    |
| 10  | H <sub>4</sub> N <sub>4</sub> F <sub>1</sub> S <sub>1</sub> | 1915.693     | 2.62                  | 0.66 | -                    |
| 11  | H <sub>5</sub> N <sub>5</sub> F <sub>1</sub> S <sub>1</sub> | 2280.825     | 2.55                  | 0.66 | -                    |
| 12  | H <sub>5</sub> N <sub>4</sub> F <sub>1</sub> S <sub>2</sub> | 2368.841     | 2.42                  | 0.87 | 0.0520               |
| 13  | H <sub>3</sub> N <sub>4</sub>                               | 1316.487     | 1.76                  | 0.70 | -                    |
| 14  | H <sub>4</sub> N <sub>4</sub>                               | 1478.539     | 1.73                  | 0.52 | -                    |
| 15  | H <sub>4</sub> N <sub>5</sub>                               | 1681.619     | 1.39                  | 0.40 | -                    |
| 16  | H <sub>5</sub> N <sub>5</sub> F <sub>1</sub>                | 1989.729     | 1.29                  | 0.60 | 0.0240               |
| 17  | H <sub>5</sub> N <sub>4</sub>                               | 1640.592     | 1.27                  | 0.51 | 0.0738               |
| 18  | H <sub>3</sub> N <sub>5</sub>                               | 1519.566     | 1.16                  | 0.54 | 0.0757               |
| 19  | H <sub>5</sub> N <sub>5</sub> S <sub>2</sub>                | 2425.862     | 1.03                  | 0.43 | -                    |
| 20  | H <sub>5</sub> N <sub>5</sub> S <sub>1</sub>                | 2134.767     | 0.87                  | 0.47 | 0.0240               |
| 21  | H <sub>3</sub> N <sub>5</sub> F <sub>1</sub>                | 1259.465     | 0.84                  | 0.34 | 0.0902               |
| 22  | H <sub>3</sub> N <sub>3</sub>                               | 1113.407     | 0.51                  | 0.18 | -                    |
| 23  | H <sub>4</sub> N <sub>3</sub> F <sub>1</sub>                | 1421.518     | 0.45                  | 0.22 | 0.0240               |
| 24  | H <sub>4</sub> N <sub>5</sub> F <sub>1</sub> S <sub>1</sub> | 2118.772     | 0.44                  | 0.29 | 0.0240               |
| 25  | H <sub>5</sub> N <sub>5</sub>                               | 1843.672     | 0.44                  | 0.24 | 0.0768               |
| 26  | H <sub>4</sub> N <sub>4</sub> S <sub>1</sub>                | 1769.635     | 0.38                  | 0.18 | -                    |
| 27  | H <sub>9</sub> N <sub>2</sub>                               | 1882.645     | 0.33                  | 0.15 | -                    |
| 28  | H <sub>8</sub> N <sub>2</sub>                               | 1720.592     | 0.27                  | 0.17 | -                    |
| 29  | H <sub>4</sub> N <sub>3</sub>                               | 1275.460     | 0.25                  | 0.16 | -                    |
| 30  | H <sub>4</sub> N <sub>5</sub> S <sub>1</sub>                | 1566.555     | 0.23                  | 0.17 | -                    |
| 31  | H <sub>4</sub> N <sub>5</sub> S <sub>1</sub>                | 1972.714     | 0.22                  | 0.21 | 0.0181               |
| 32  | H <sub>6</sub> N <sub>5</sub> F <sub>1</sub> S <sub>1</sub> | 2442.878     | 0.20                  | 0.13 | -                    |
| 33  | H <sub>6</sub> N <sub>5</sub> S <sub>3</sub>                | 2879.011     | 0.17                  | 0.36 | 0.0240               |
| 34  | H <sub>6</sub> N <sub>5</sub> F <sub>1</sub> S <sub>3</sub> | 3025.069     | 0.16                  | 0.34 | -                    |
| 35  | H <sub>6</sub> N <sub>2</sub>                               | 1396.486     | 0.16                  | 0.17 | -                    |
| 36  | H <sub>5</sub> N <sub>2</sub>                               | 1234.433     | 0.15                  | 0.12 | -                    |
| 37  | H <sub>6</sub> N <sub>5</sub> F <sub>1</sub> S <sub>2</sub> | 2733.973     | 0.15                  | 0.11 | 0.0240               |

|    |                                                             |          |      |      |        |
|----|-------------------------------------------------------------|----------|------|------|--------|
| 38 | H <sub>7</sub> N <sub>2</sub>                               | 1558.539 | 0.10 | 0.11 | -      |
| 39 | H <sub>6</sub> N <sub>3</sub> S <sub>1</sub>                | 1890.661 | 0.08 | 0.06 | -      |
| 40 | H <sub>5</sub> N <sub>3</sub> S <sub>1</sub>                | 1728.608 | 0.07 | 0.06 | -      |
| 41 | H <sub>4</sub> N <sub>3</sub> F <sub>1</sub> S <sub>1</sub> | 1712.613 | 0.05 | 0.09 | -      |
| 42 | H <sub>5</sub> N <sub>3</sub> F <sub>1</sub> S <sub>1</sub> | 1874.666 | 0.04 | 0.04 | -      |
| 43 | H <sub>3</sub> N <sub>2</sub>                               | 910.328  | 0.04 | 0.05 | -      |
| 44 | H <sub>5</sub> N <sub>3</sub>                               | 1437.513 | 0.03 | 0.05 | 0.0393 |
| 45 | H <sub>3</sub> N <sub>2</sub> F <sub>1</sub>                | 1056.386 | 0.03 | 0.04 | -      |
| 46 | H <sub>5</sub> N <sub>4</sub> F <sub>2</sub> S <sub>1</sub> | 2223.803 | 0.03 | 0.05 | -      |
| 47 | H <sub>6</sub> N <sub>3</sub> F <sub>1</sub> S <sub>1</sub> | 2036.719 | 0.02 | 0.03 | -      |
| 48 | H <sub>4</sub> N <sub>2</sub>                               | 1072.381 | 0.02 | 0.05 | -      |
